# Supplementary material for: Effect of femoral component design and quadriceps load on patellofemoral kinematics after total knee arthroplasty: an in vitro cadaveric study
Source: Knee Surg Relat Res. 2026 Feb 26;38:9. doi: 10.1186/s43019-026-00308-6 (PMC12937521; doi:10.1186/s43019-026-00308-6)
Supplement: Supplementary file 1 — Supplementary material 1. [file 43019_2026_308_MOESM1_ESM.docx]

# SUPPLEMENTARY MATERIALS

Appendix to the paper:

Effect of Femoral Component Design and Quadriceps Load on Patellofemoral Kinematics After Total Knee Arthroplasty: An In Vitro Cadaveric Study

## **SUPPLEMENTARY MATERIAL #1**

### **Influence of the quadriceps muscle for all degrees of freedom of the patellofemoral joint after TKA**

This section provides a comprehensive visualization of all six kinematic components (Figure S1_1) of the patellofemoral joint following TKA, expanding upon the results presented in the main manuscript. Specifically, the plots show the median ± standard deviation across all specimens, grouped according to the three investigated quadriceps control parameters: QVML (line of action direction in the frontal plane), QVAP (line of action direction in the sagittal plane), and QVload (muscle force magnitude).
Additionally, the variation of each kinematic parameter relative to the reference test (neutral direction and 20N load) is plotted, again as median ± SD across specimens.
Finally, statistical significance of the effect of each quadriceps parameter on patellofemoral motion is assessed using the Kruskal-Wallis test with Bonferroni correction, and corresponding p-values are reported for all degrees of freedom (3 translations + 3 rotations).


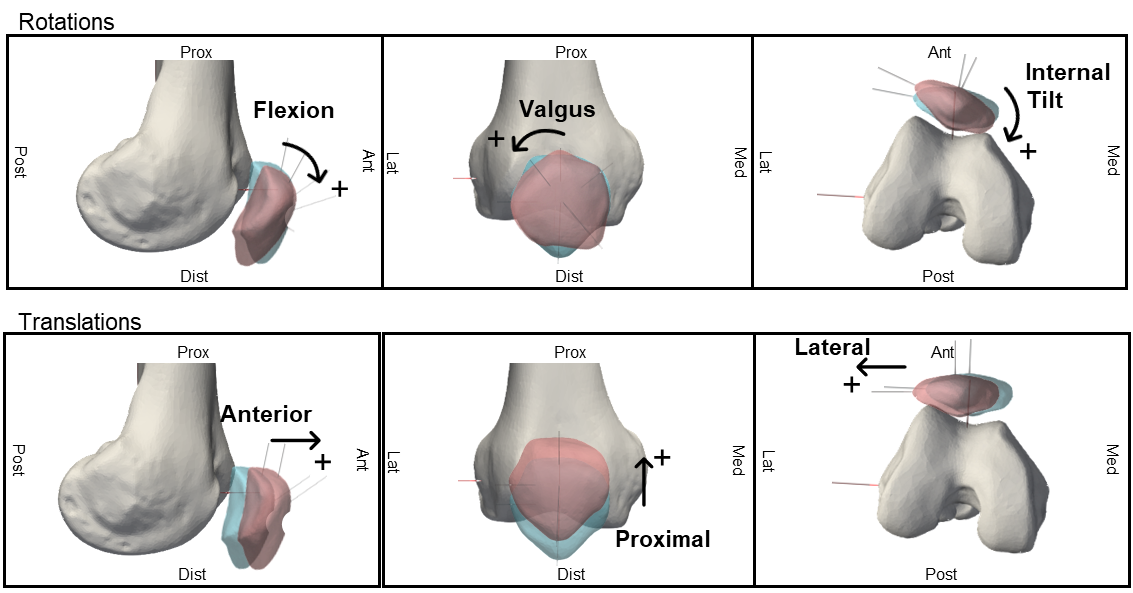


Figure S1_1: Motion components of the patellofemoral joint of a right leg. Figshare repository (10.6084/m9.figshare.30019969).


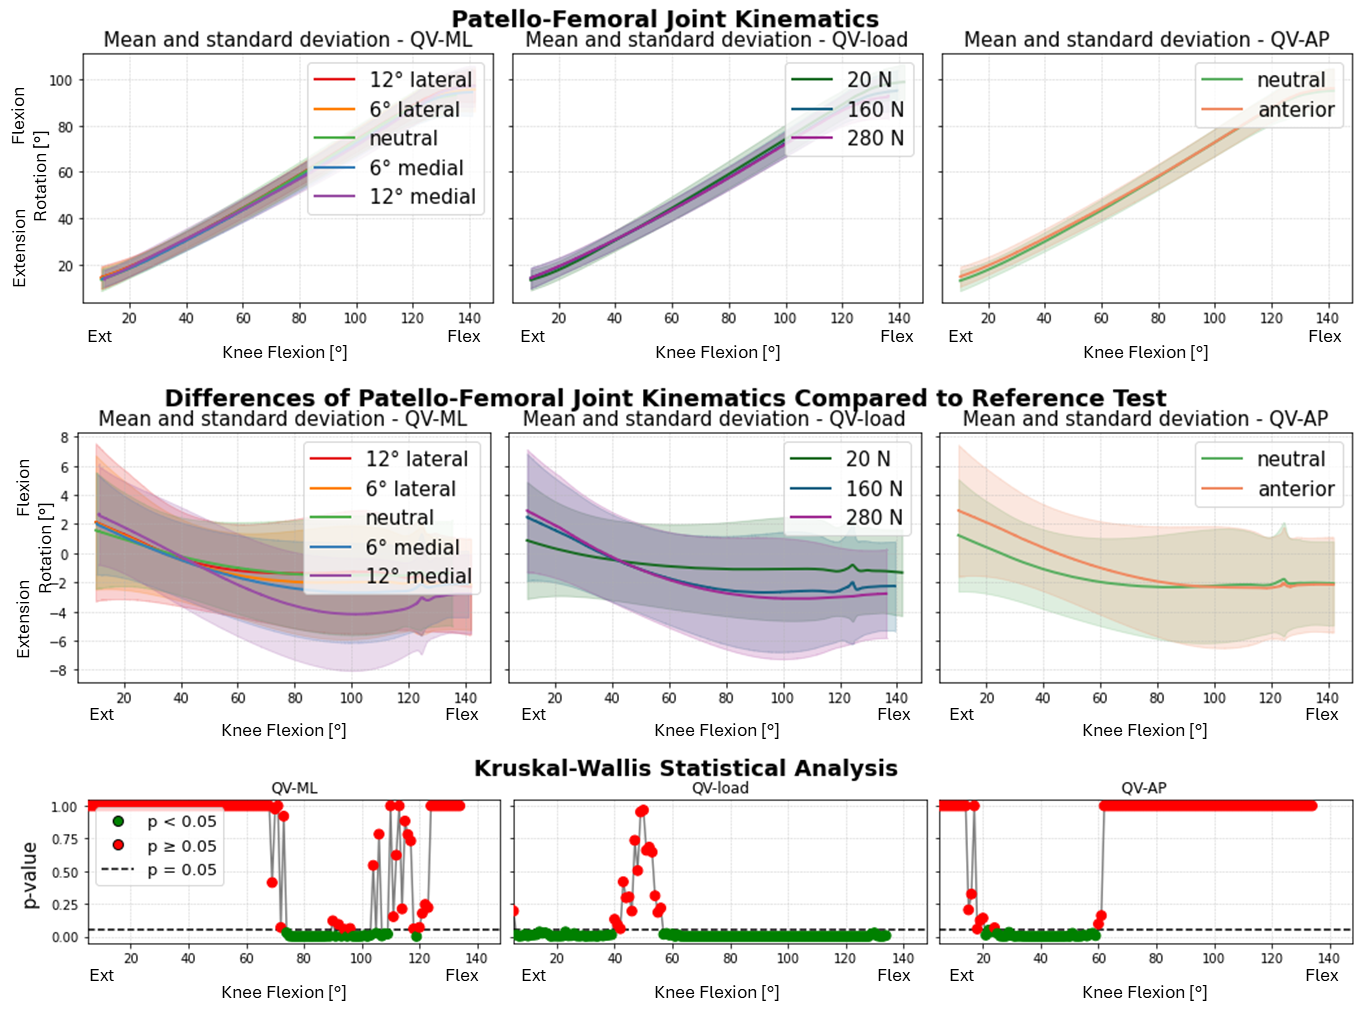


Figure S1_2: Flexion-Extension rotation of the patella after TKA without patellar resurfacing. TOP: absolute values as a function of knee flexion angle (the median and standard deviation between 12 specimens are plotted). CENTER: differences of all tests compared with the reference test (QVload = 20 N, QVML = neutral, QVAP = posterior). Left shows the difference as a function of QVML, middle QVload, right QVAP. BOTTOM: significance of the differences plotted at the center. The p-value trend is plotted for the three parameters (left QVML, middle QVload, right QVAP); the significant values are highlighted in green (p<0.05), the non significant ones in red (p≥0.05).


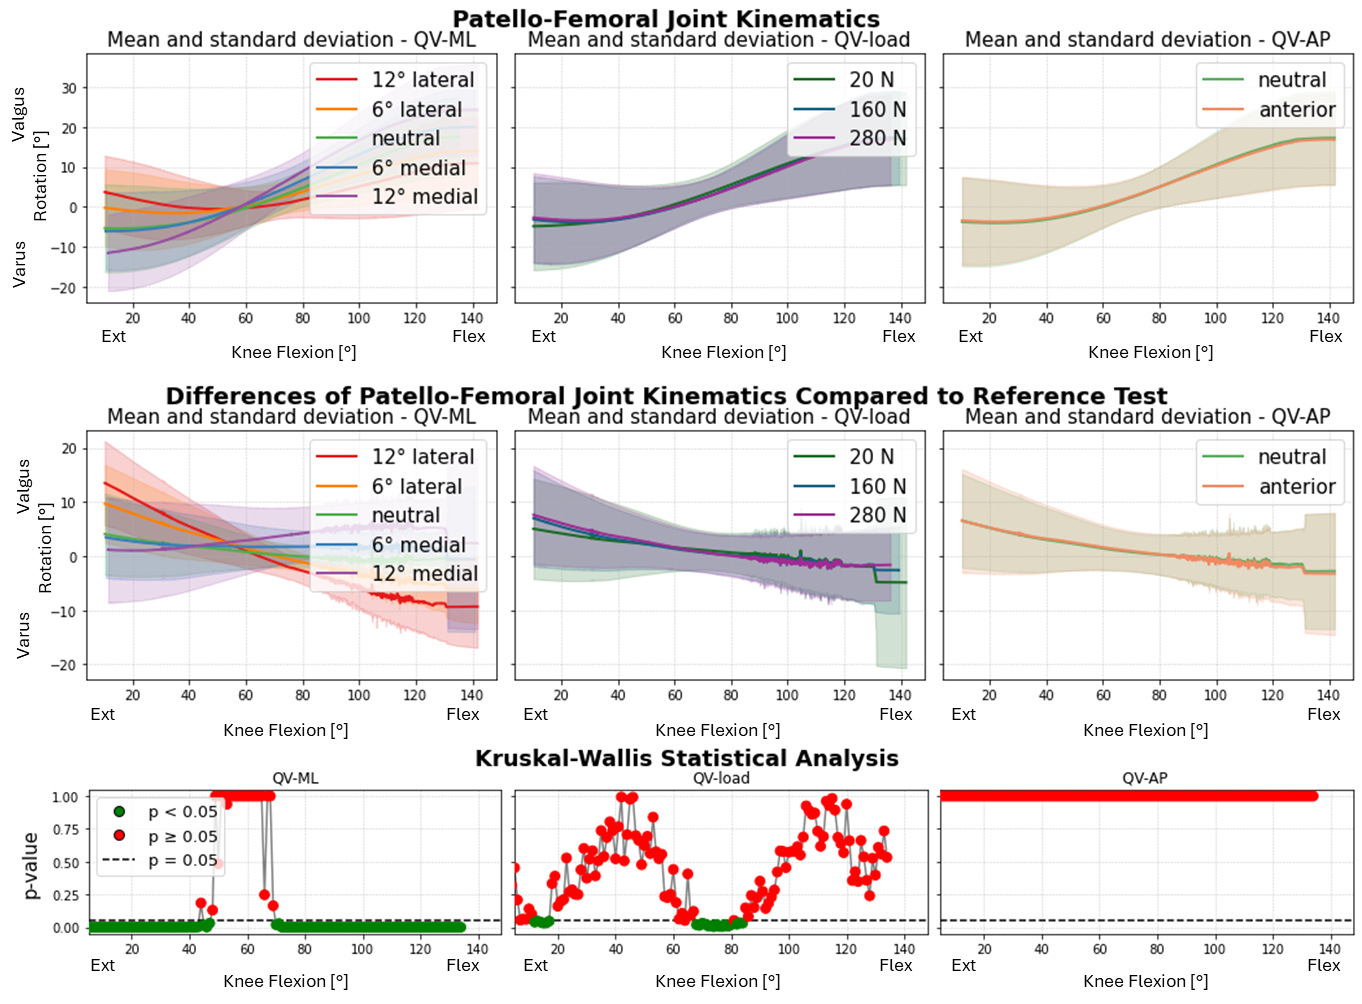


Figure S1_3: Varus-valgus rotation of the patella after TKA without patellar resurfacing. TOP: absolute values as a function of knee flexion angle (the median and standard deviation between 12 specimens are plotted). CENTER: differences of all tests compared with the reference test (QVload = 20 N, QVML = neutral, QVAP = posterior). Left shows the difference as a function of QVML, middle QVload, right QVAP. BOTTOM: significance of the differences plotted at the center. The p-value trend is plotted for the three parameters (left QVML, middle QVload, right QVAP); the significant values are highlighted in green (p<0.05), the non significant ones in red (p≥0.05).


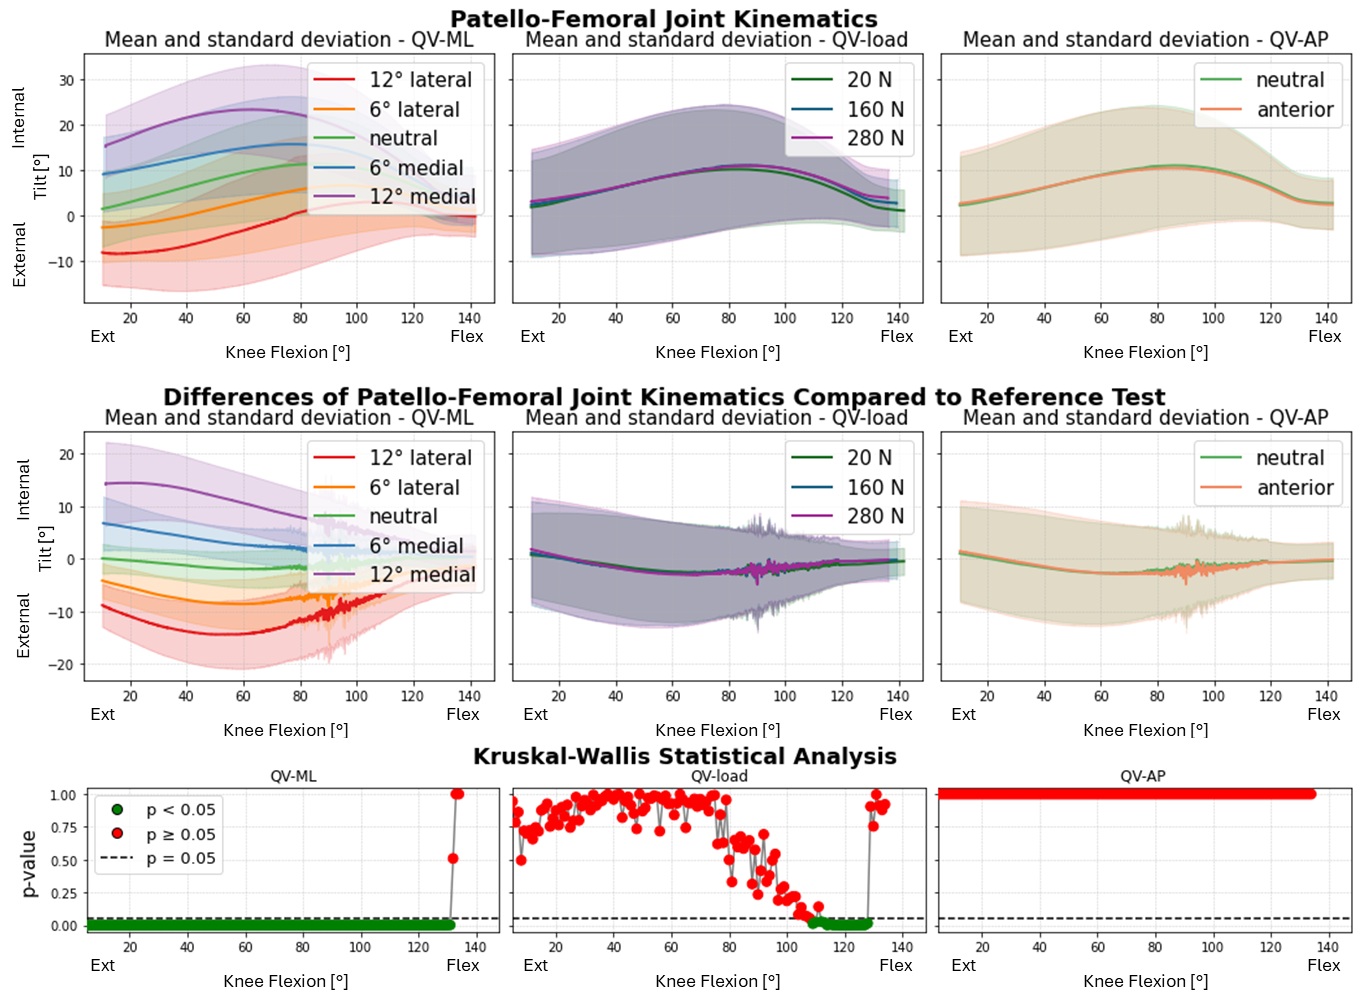


Figure S1_4: Internal-External of the patella after TKA without patellar resurfacing. TOP: absolute values as a function of knee flexion angle (the median and standard deviation between 12 specimens are plotted). CENTER: differences of all tests compared with the reference test (QVload = 20 N, QVML = neutral, QVAP = posterior). Left shows the difference as a function of QVML, middle QVload, right QVAP. BOTTOM: significance of the differences plotted at the center. The p-value trend is plotted for the three parameters (left QVML, middle QVload, right QVAP); the significant values are highlighted in green (p<0.05), the non significant ones in red (p≥0.05).


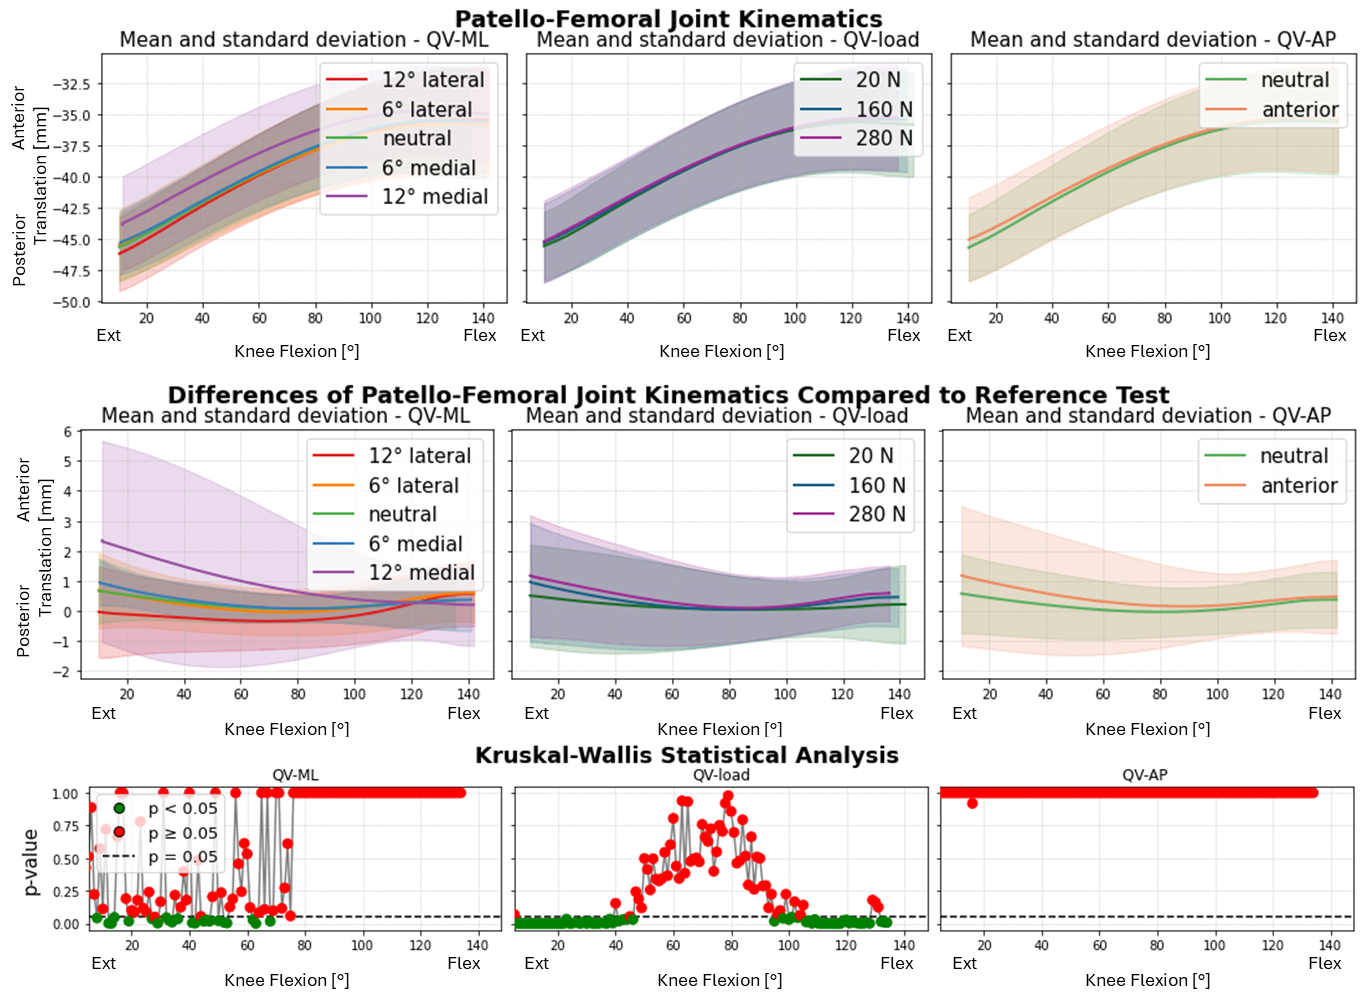


Figure S1_5: Anterior-Posterior translation of the patella after TKA without patellar resurfacing. TOP: absolute values as a function of knee flexion angle (the median and standard deviation between 12 specimens are plotted). CENTER: differences of all tests compared with the reference test (QVload = 20 N, QVML = neutral, QVAP = posterior). Left shows the difference as a function of QVML, middle QVload, right QVAP. BOTTOM: significance of the differences plotted at the center. The p-value trend is plotted for the three parameters (left QVML, middle QVload, right QVAP); the significant values are highlighted in green (p<0.05), the non significant ones in red (p≥0.05).


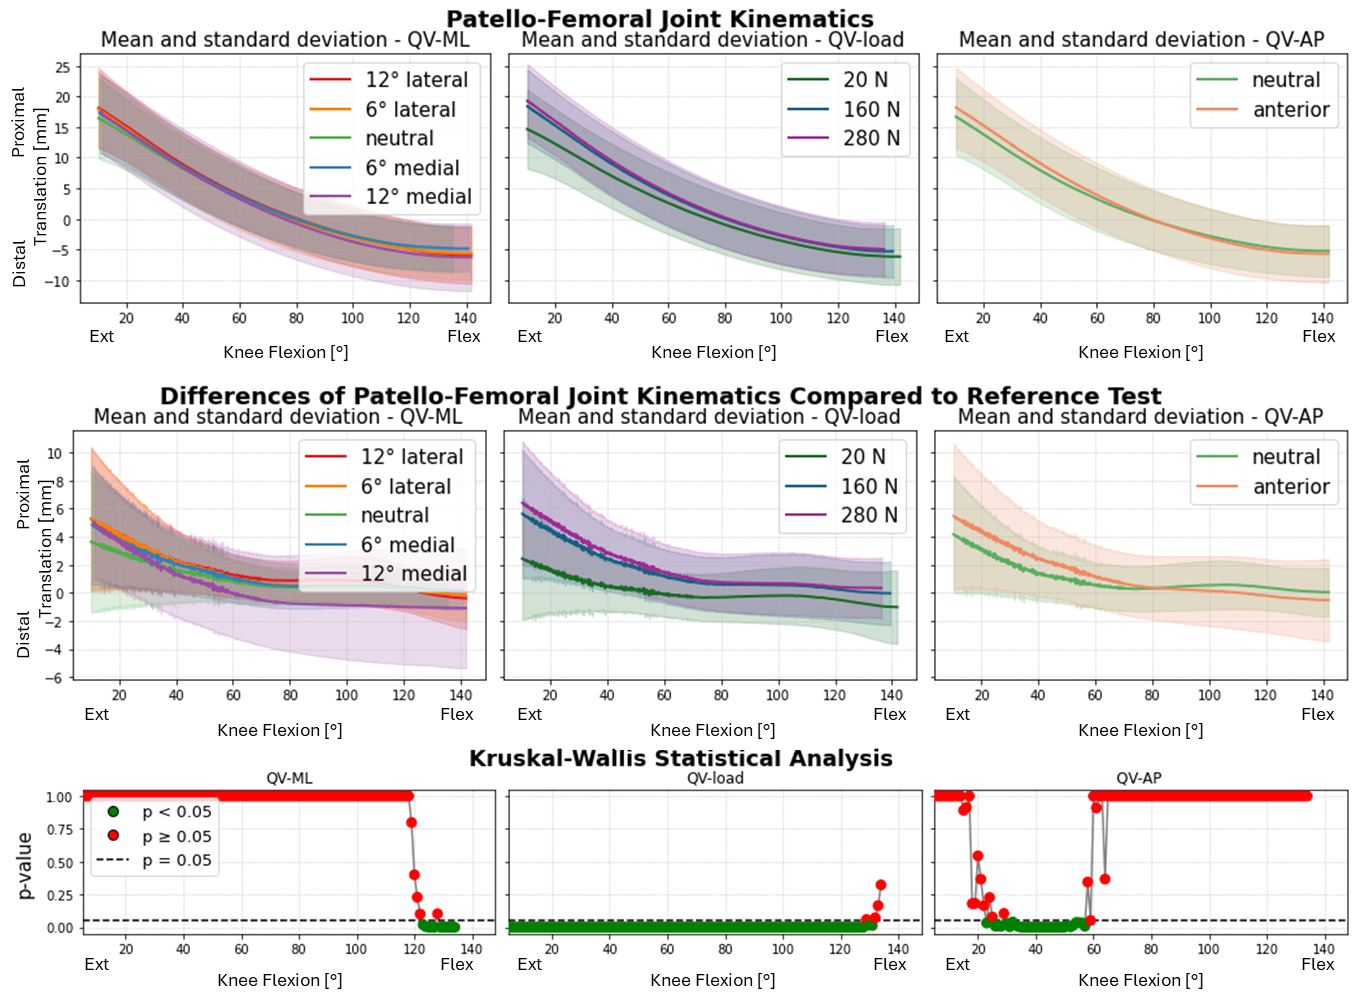


Figure S1_6: Proximal-Distal translation of the patella after TKA without patellar resurfacing. TOP: absolute values as a function of knee flexion angle (the median and standard deviation between 12 specimens are plotted). CENTER: differences of all tests compared with the reference test (QVload = 20 N, QVML = neutral, QVAP = posterior). Left shows the difference as a function of QVML, middle QVload, right QVAP. BOTTOM: significance of the differences plotted at the center. The p-value trend is plotted for the three parameters (left QVML, middle QVload, right QVAP); the significant values are highlighted in green (p<0.05), the non significant ones in red (p≥0.05).


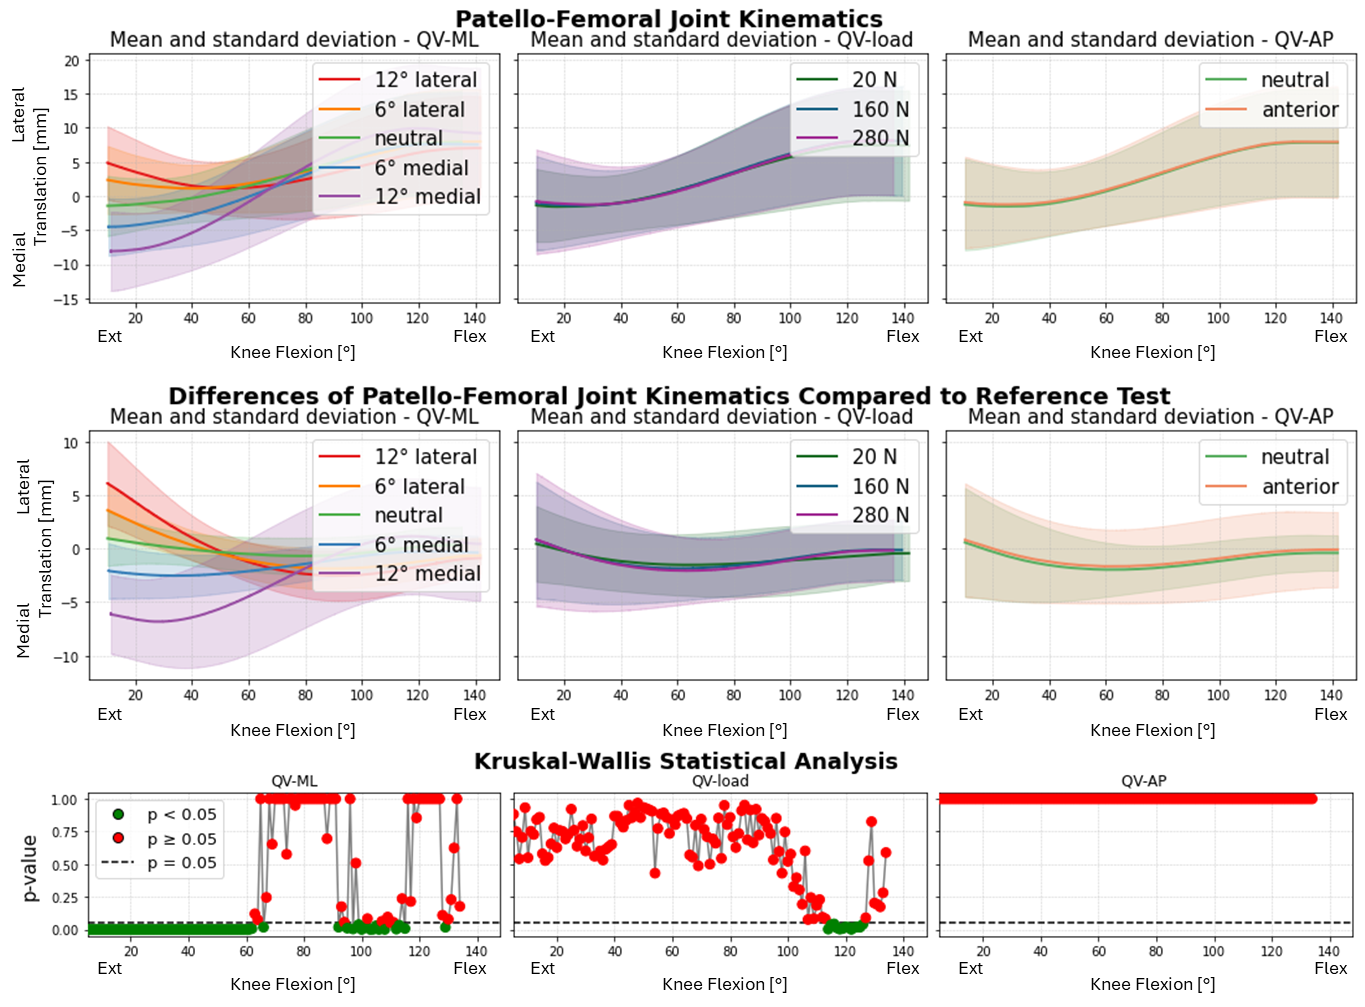


Figure S1_7: Medial-Lateral translation of the patella after TKA without patellar resurfacing. TOP: absolute values as a function of knee flexion angle (the median and standard deviation between 12 specimens are plotted). CENTER: differences of all tests compared with the reference test (QVload = 20 N, QVML = neutral, QVAP = posterior). Left shows the difference as a function of QVML, middle QVload, right QVAP. BOTTOM: significance of the differences plotted at the center. The p-value trend is plotted for the three parameters (left QVML, middle QVload, right QVAP); the significant values are highlighted in green (p<0.05), the non significant ones in red (p≥0.05).
